# Supplementary material
Source: Research Square preprint supplement (doi:10.21203/rs.3.rs-9247038/v1)
Supplement: Supplementary file 1 [file 0f2d3310c2481fc03b4ef765.docx]

**Interview Guide: Family Members**

**Family Relationship**

1. Describe your relationship with your family member.

2. How involved are you in your family member’s health?

**Consequences of Incarceration on the Family**

3. How has his incarceration affected your family - financially, your relationship with him, or the family dynamic?

4. Do you visit your family member in the prison? What have the visits been like?

**Perceptions of TB/LTBI and TPT**

5. How did your family member talk to you about the preventive treatment? How did you feel about the news?

6. How would you explain tuberculosis to a friend or relative?

7. How would you explain latent tuberculosis infection (LTBI) to a friend or relative?

8. How do you feel about the preventive treatment he received?

**Situation After Release**

9. What is your family member’s access to healthcare like while he is incarcerated? What will it be like after he is released?

10. What difficulties do you think he would face in continuing preventive treatment after leaving prison?

11. What was his housing situation like before, and what will it be like after incarceration? Who else will be living with him?

**Social/Community Support**

12. What kind of support or services would have helped you and your family member during incarceration and after release?

**Personal Experience with the Healthcare System**

13. Describe your experiences with the healthcare system and your access to healthcare.

14. How would you describe your physical and mental health currently?

**Hypothetical Scenarios Related to Perceptions of LTBI/TPT**

15. If you were diagnosed with latent tuberculosis infection, would you take the preventive treatment? Why or why not?
