# Supplementary material
Source: Research Square preprint supplement (doi:10.21203/rs.3.rs-9247038/v1)
Supplement: Supplementary file 2 [file db9b1a1935e52625faf9db32.docx]

**Focus Group Guide: Persons Deprived of Liberty**

***Key Areas of Interest for the Focus Groups**

**Healthcare Communication / Trust in Science and Health Professionals**

1. Did the health professionals provide enough information about latent tuberculosis infection (LTBI) and tuberculosis (TB)?

**Understanding of TB and LTBI**

2. How would you explain tuberculosis to a friend or family member?

3. How would you explain latent tuberculosis infection (LTBI) to a friend or family member?

**Perception of Own Risk / Severity of LTBI**

4. How did you feel when you learned you had latent tuberculosis infection? What went through your mind?

5. What things did you think about before deciding to start treatment?

**Support to Begin Treatment**

6. Did you talk to anyone about your diagnosis? What was the conversation like?

7. What helped you start treatment? What would it have been like without that support?

**Effects of the Medication (Positive or Negative / Side Effects)**

8. How did you feel during treatment?

**Attitudes Toward the Healthcare System / Prior Experiences with the Healthcare System**

9. What difficulties did you face during treatment? How did you deal with them?

10. If you could change something about the treatment, what would you change?

**Motivation to Complete Treatment**

11. What was your experience like during treatment?

12. What were the reasons that led you to complete treatment?

**Perception of Stigma**

13. Did you experience prejudice while undergoing LTBI treatment? What was your experience like?

14. Have you ever heard of prejudice against people with tuberculosis? Tell us about your experience.

**Social Support**

15. What kind of support do you think is needed for people to be able to start and continue treatment?

**Hypothetical Scenarios, Including the Possibility of Being Released from Prison During Treatment**

16. What do you think could make it difficult for someone to follow a treatment in prison or outside of prison?

17. If you had been released or transferred during treatment, how do you think that would have affected your ability to continue treatment?

18. What do you think could be done to help people continue treatment after leaving prison?

19. What do you think about taking treatments to prevent diseases? Would you take a preventive treatment for another disease? Why or why not?

20. There is a new version of this treatment that involves daily pills for 1 month, rather than weekly pills for 3 months. It has not yet been adopted in Brazil but may be in the future. What do you think about the potential one-month option?

21. How have your previous experiences with the healthcare system, health professionals, or other medical treatments affected your trust or decision to take the preventive treatment for tuberculosis?
